# Supplementary material for: Temperature-sensitive carbon dots derived from poly(N-isopropylacrylamide) for fluorescence on–off properties
Source: Royal Society of Chemistry journal article supplement (doi:10.1039/c6ra25104h), 2017-01-01
Supplement: c6ra25104h1.pdf [file c6ra25104h1.pdf]

Supporting Information

# **Temperature-sensitive Carbon Dots Derived from Poly(N-isopropylacrylamide) for Fluorescence On-off Properties**

*Zihnil Adha Islamy Mazrad<sup>†1</sup>, Eun Bi Kang<sup>†2</sup>, Nuraeni<sup>1</sup>, Gibaek Lee<sup>2</sup>, Insik in<sup>1,3\*</sup> and Sung Young Park<sup>1,2\*</sup>*

<sup>1</sup> Department of IT Convergence, Korea National University of Transportation, Chungju 380-702, Republic of Korea

<sup>2</sup> Department of Chemical and Biological Engineering, Korea National University of Transportation, Chungju 380-702, Republic of Korea

<sup>3</sup> Department of Polymer Science and Engineering, Korea National University of Transportation, Chungju 380-702, Republic of Korea

<sup>†</sup>These authors equally contributed to this work

\*Corresponding author

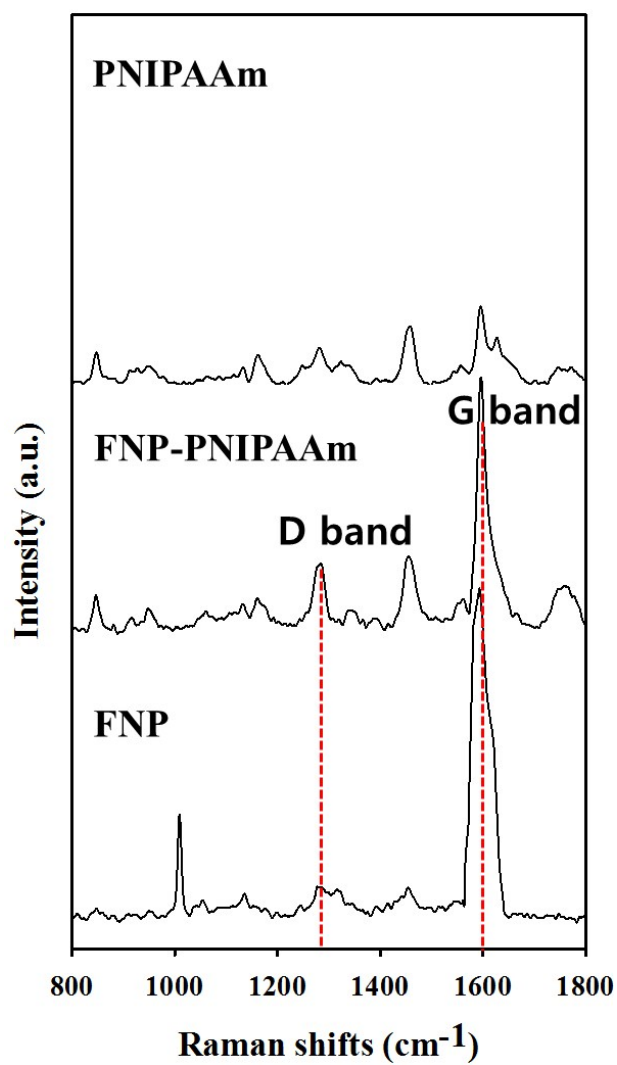

**Fig S1.** Raman shift (cm<sup>-1</sup>) of G/D bands of PNIPAAm, FNP-PNIPAAm and FNP.

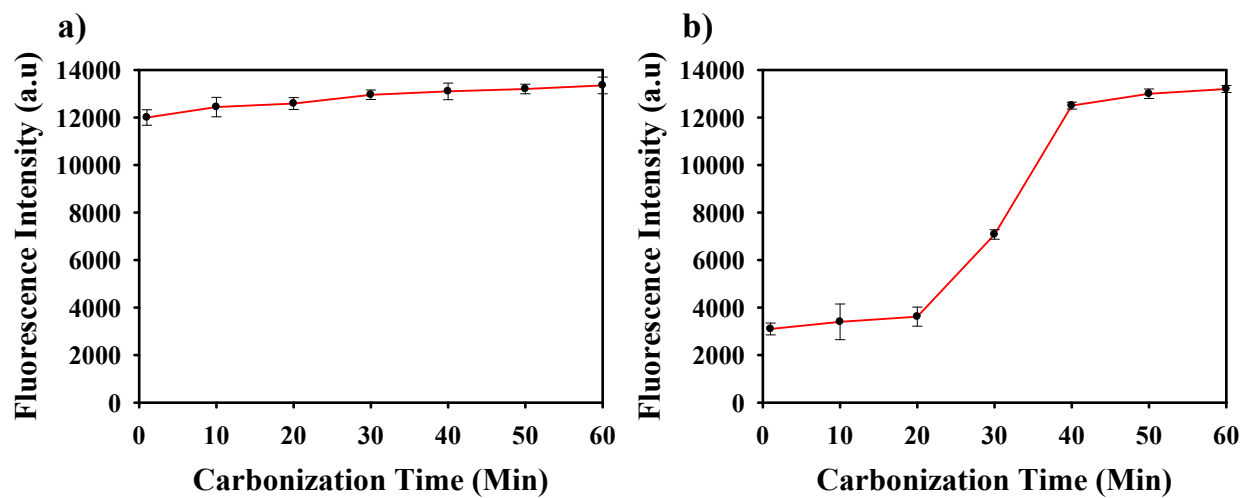

**Fig S2.** PL emission spectra of FNP based PNIPAAm for various carbonization times at maximum emission wavelength (380 nm) under an excitation wavelength of 340 nm at (a) 25 and (b) 37°C.

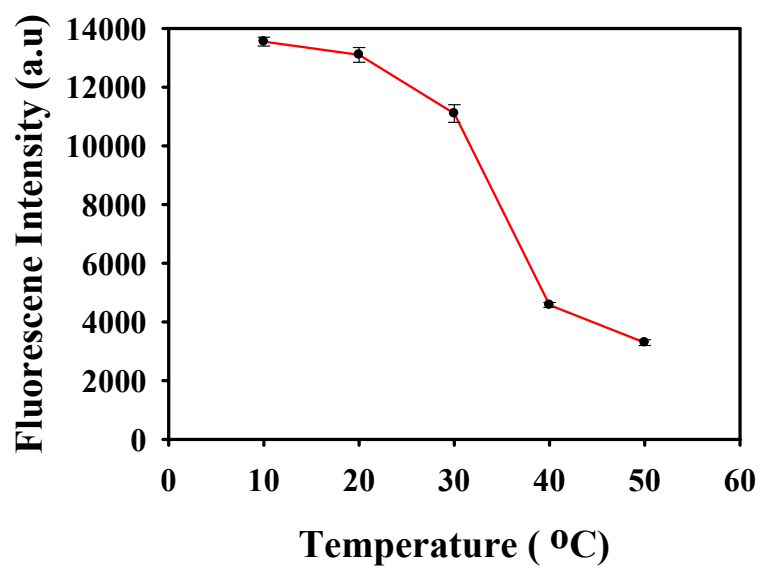

**Fig S3.** PL emission spectra of FNP-PNIPAAm at temperature range (10-50 °C) at maximum emission wavelength (380 nm) under an excitation wavelength of 340 nm.

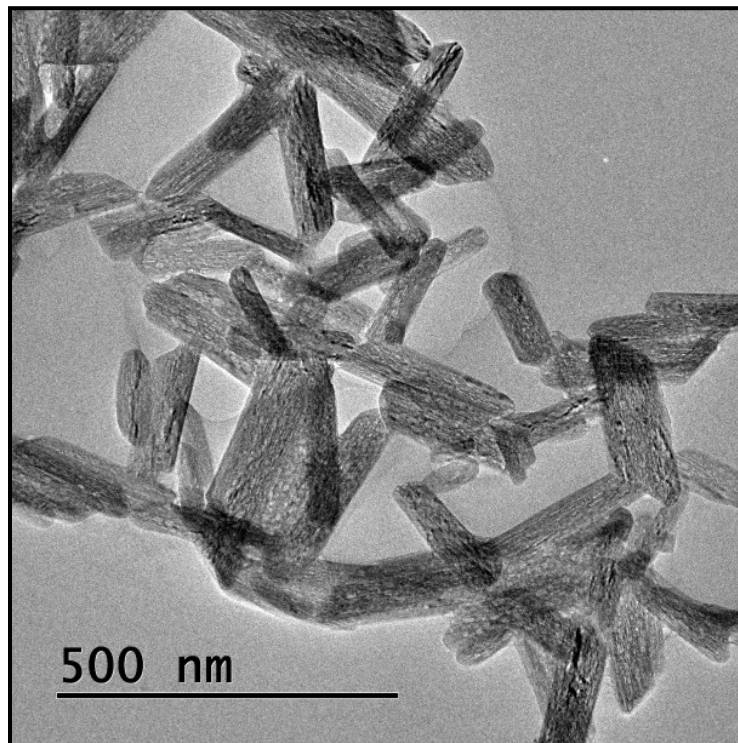

**Fig S4.** TEM images of PNIPAAm.

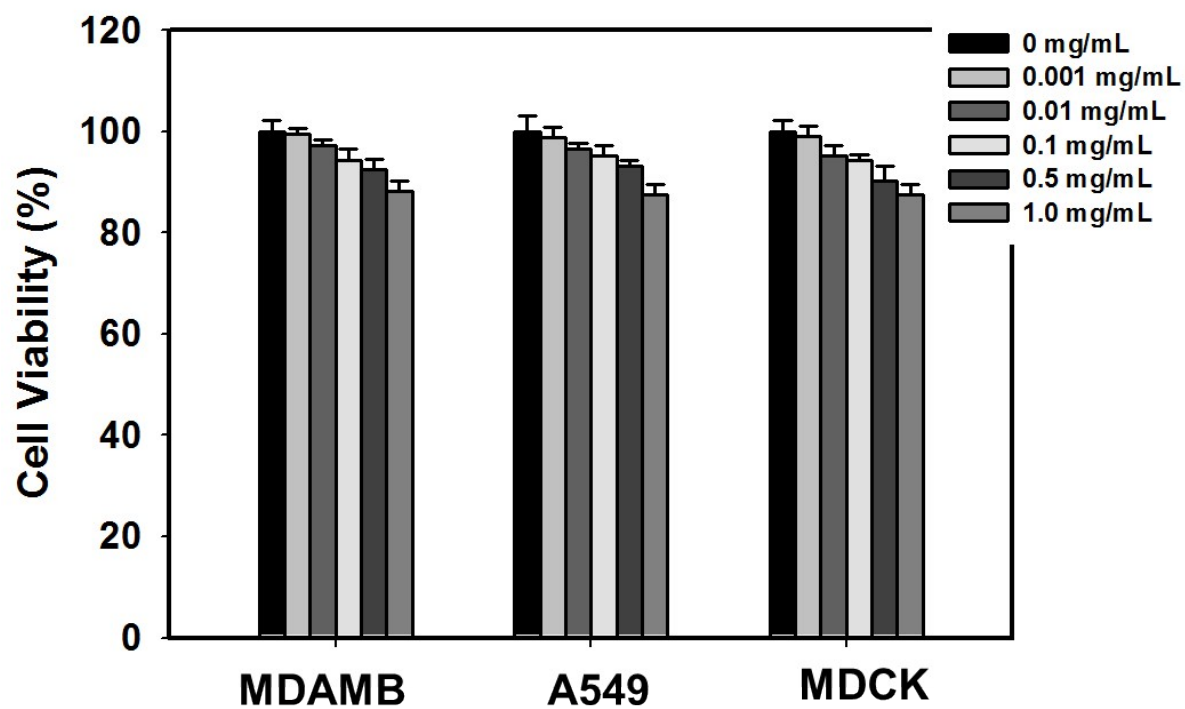

**Fig. S5.** Cell viability of FNP after 24 h of incubation using MDAMB, A549, and MDCK cells.
